# Supplementary material for: Rational Design of a Peptidomimetic Inhibitor of Gelsolin Amyloid Aggregation
Source: MDPI journal article supplement (doi:10.3390/ijms232213973), 2022-11-12
Supplement: s1 [file s1]

## **Rational design of a peptidomimetic inhibitor of gelsolin amyloid aggregation**

Michela Bollati<sup>1</sup>, Kaliroi Peqini<sup>2</sup>, Luigi Barone<sup>2</sup>, Carmina Natale<sup>3</sup>, Marten Beeg<sup>3</sup>, Marco Gobbi<sup>3</sup>, Luisa Diomede<sup>3</sup>, Michelangelo Trucchi<sup>1</sup>, Matteo de Rosa<sup>1\*</sup> and Sara Pellegrino<sup>2\*</sup>

<sup>1</sup> Institute of Biophysics, National Research Council (IBF-CNR), c/o Department of Biosciences, University of Milano, Via Celoria 26, 20133 Milano, Italy

<sup>2</sup> Department of Pharmaceutical Science, “A. Marchesini” General and Organic Chemistry Section, University of Milano, Via Venezian 21, 20133 Milano, Italy

<sup>3</sup> Department of Molecular Biochemistry and Pharmacology, Istituto di Ricerche Farmacologiche Mario Negri IRCCS, Via Mario Negri 2, 20156 Milano, Italy

Supplementary figures:

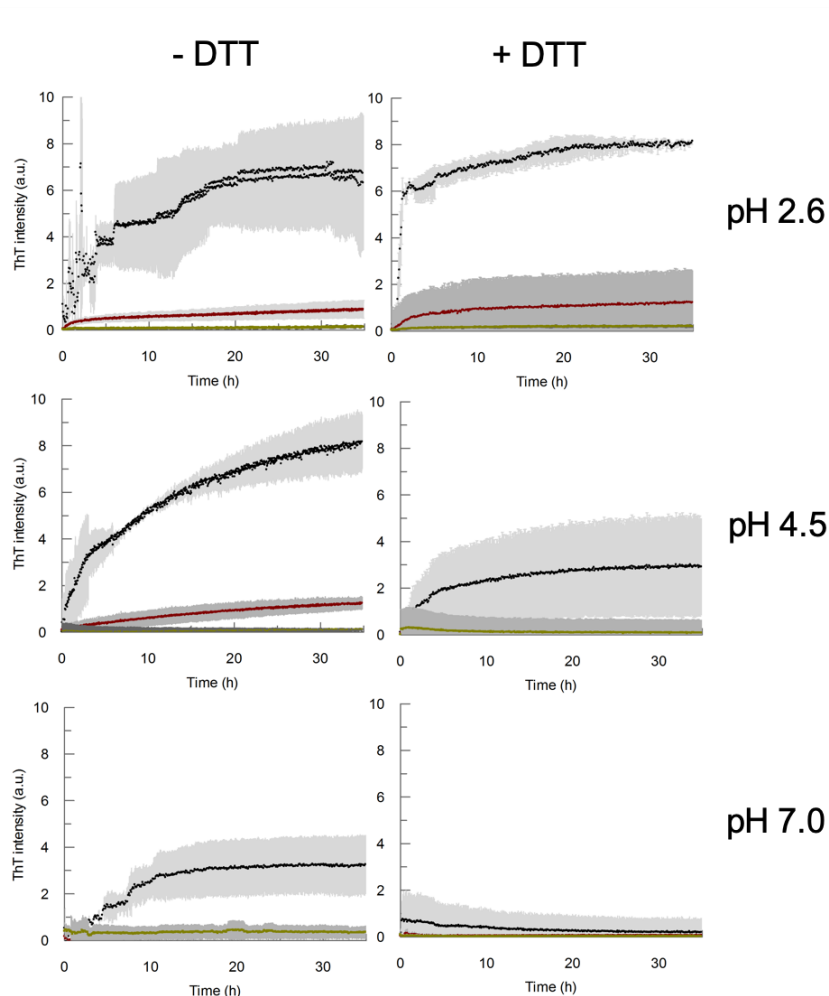

Figure S1: Representative curves of ThT fluorescence assays showing GAC<sub>182-192</sub> aggregation under different conditions. The concentration of GAC<sub>182-192</sub> was varied between 25( $\mu$ M (green trace) and 100  $\mu$ M (black trace), in 100 mM NaCl and 200 mM Sodium Acetate pH 2.6, or 200 mM Sodium Citrate pH 4.5, or 200 mM HEPES pH 7.0; Both in the presence and absence of 1 mM DTT.

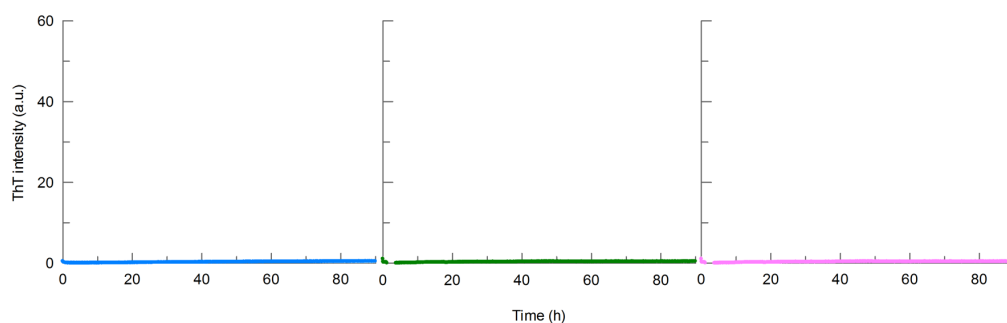

Figure S2: ThT fluorescence of the LB peptidomimetics (LB-5 blue trace; LB-6 green; LB-7 magenta) under the same conditions used for GAC<sub>182-192</sub> aggregation assay and at the highest concentration tested. Y axis scales as in figure 2.

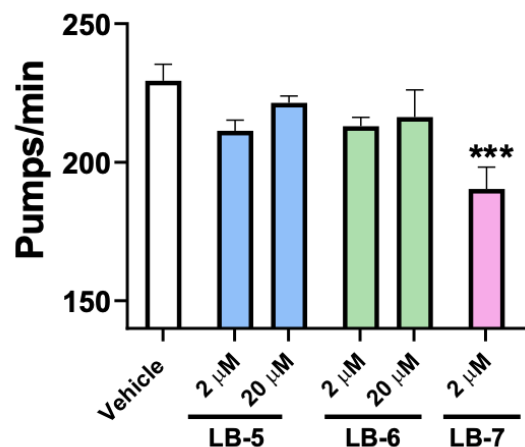

Figure S3: *Effect of peptidomimetics on the pharyngeal function of C. elegans.* LBs were administered to worms at 2 or 20  $\mu\text{M}$  in 200 mM sodium citrate, pH 4.5, containing 100 mM NaCl (50 worms/50  $\mu\text{L}$ ). Control worms were treated with 100 mM sodium citrate, pH 4.5 alone (50 worms/50  $\mu\text{L}$ ) (Vehicle). The pharyngeal activity was determined 24 h after treatment. Data are mean  $\pm$  SE ( $N=10$ ). \*\*\* $p<0.001$  vs Vehicle, one-way ANOVA, and Bonferroni's post hoc analysis.

GAC<sub>182-192</sub>

HPLC chromatogram

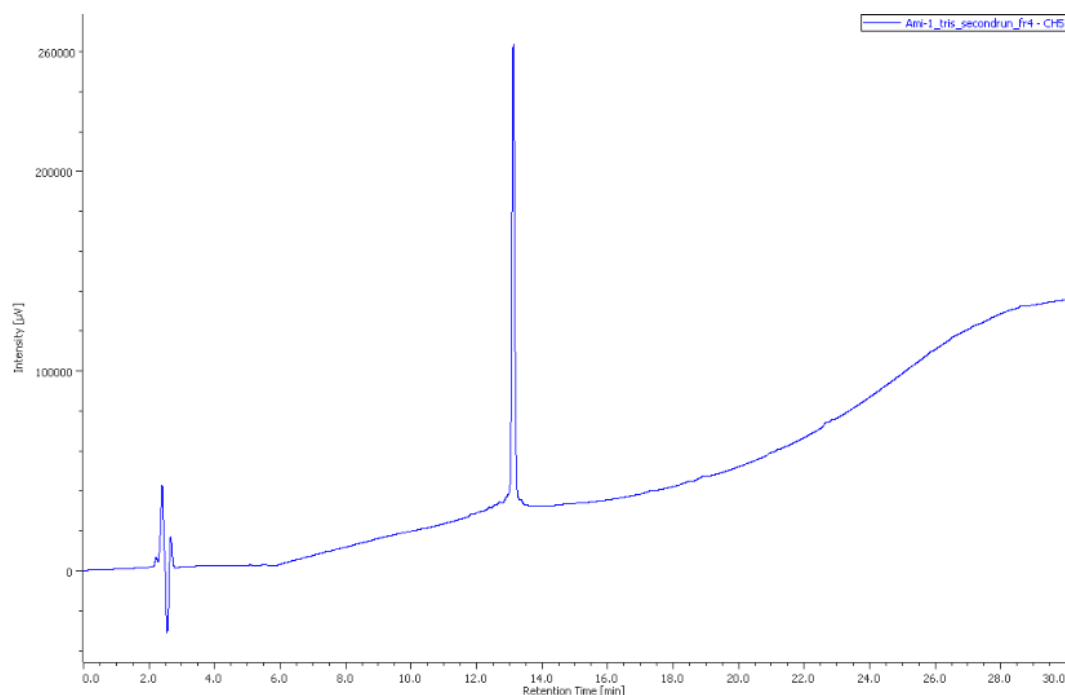

ESI/MS spectrum

#15799 AV: 10 IT: 5.008 ST: 0.73 uS: 3 NL: 5.01E4  
F: ITMS + c HESI Full ms [50.00-2000.00]

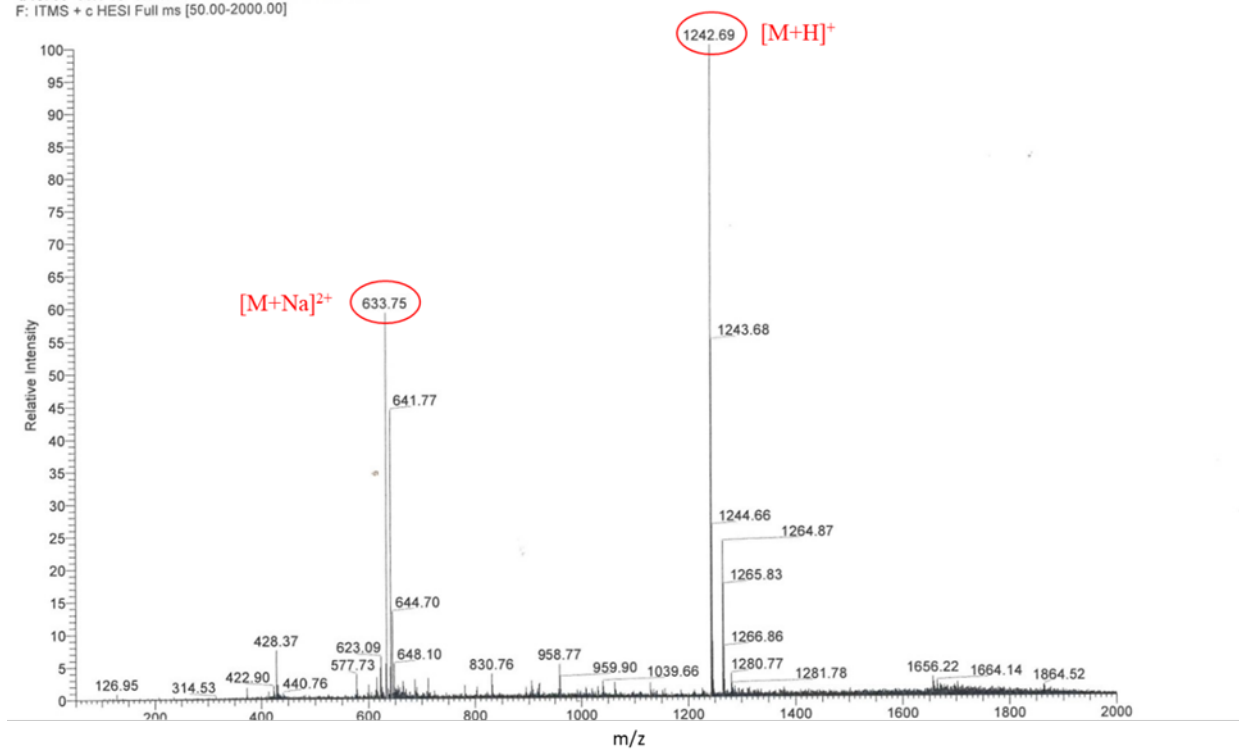

LB-5

HPLC chromatogram

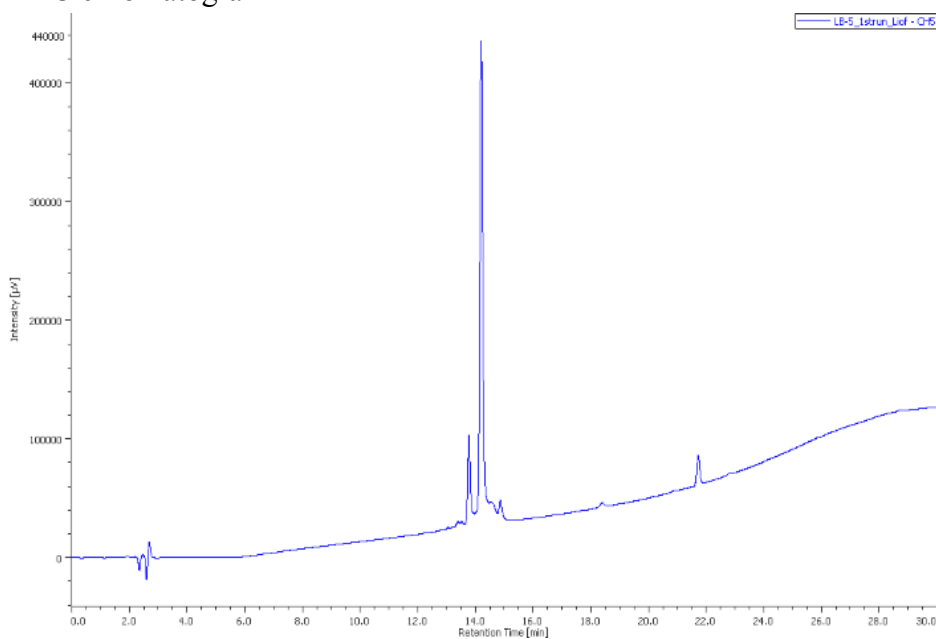

ESI/MS spectrum

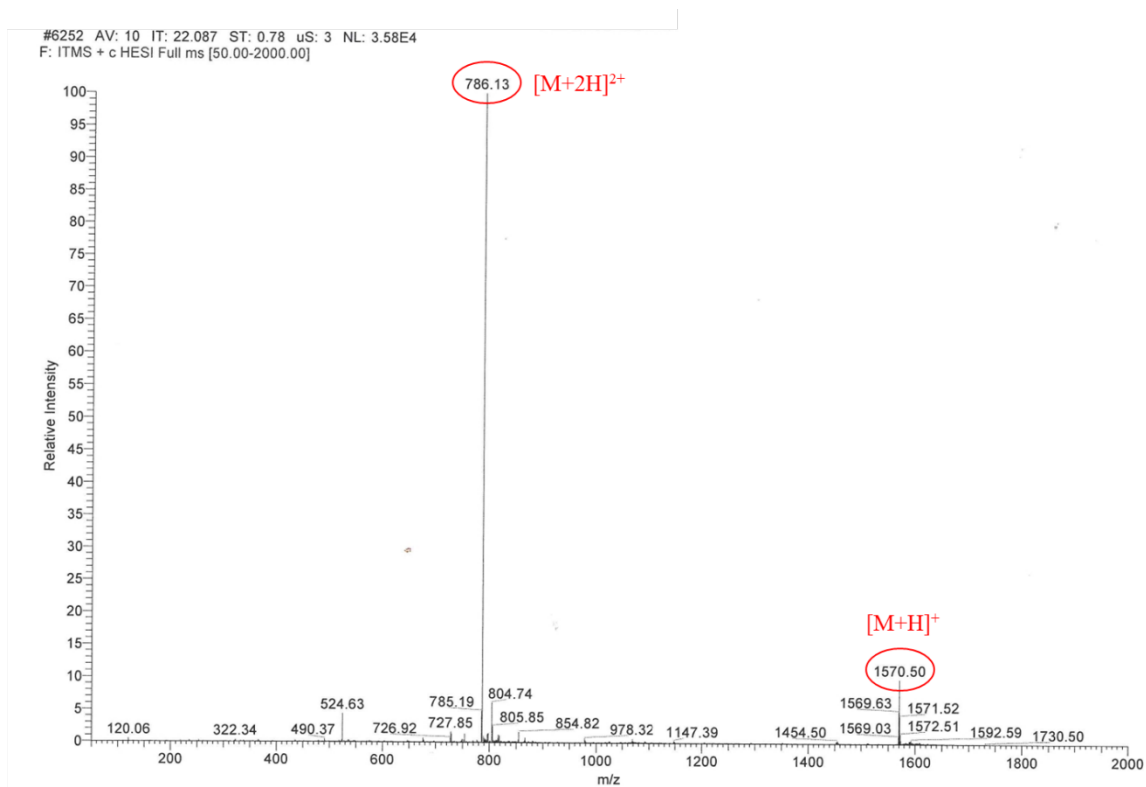

LB-6

HPLC chromatogram

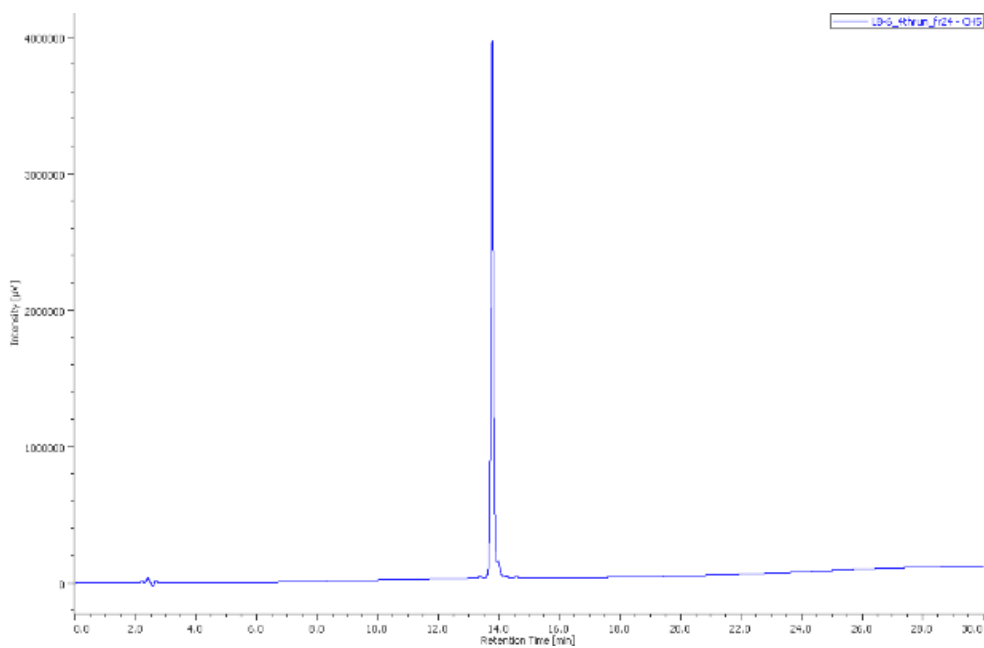

ESI/MS spectrum

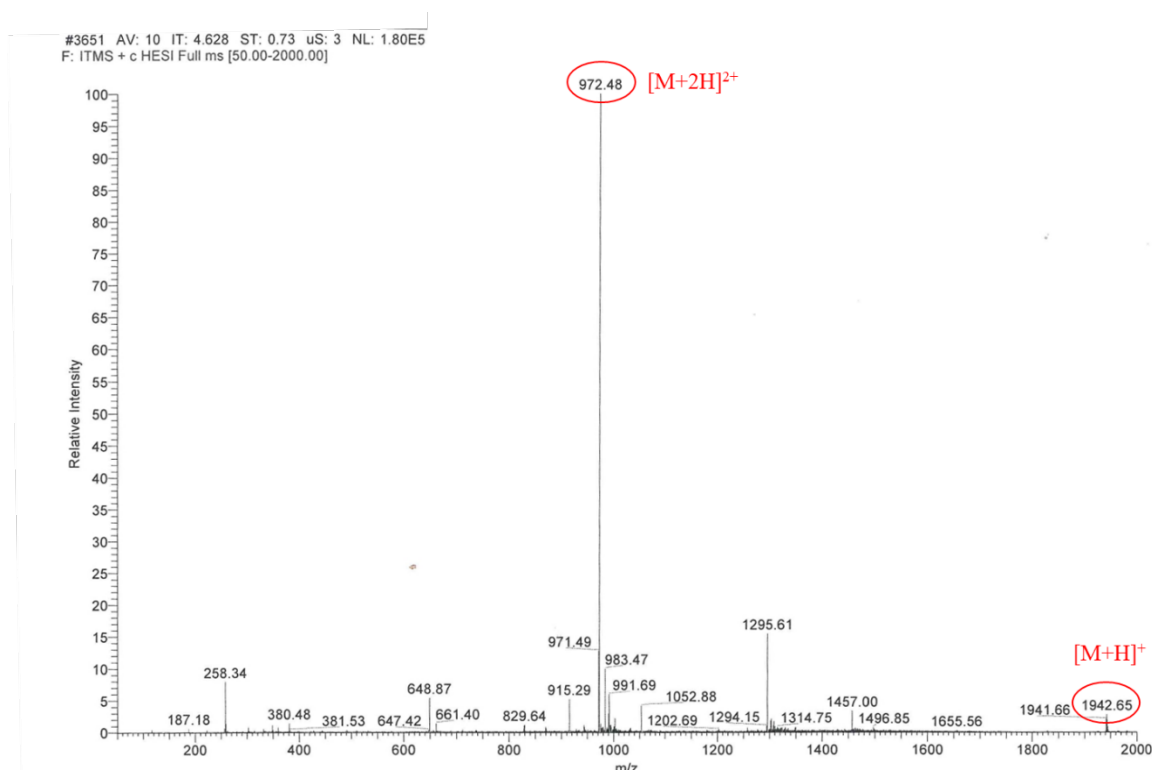

## HRMS

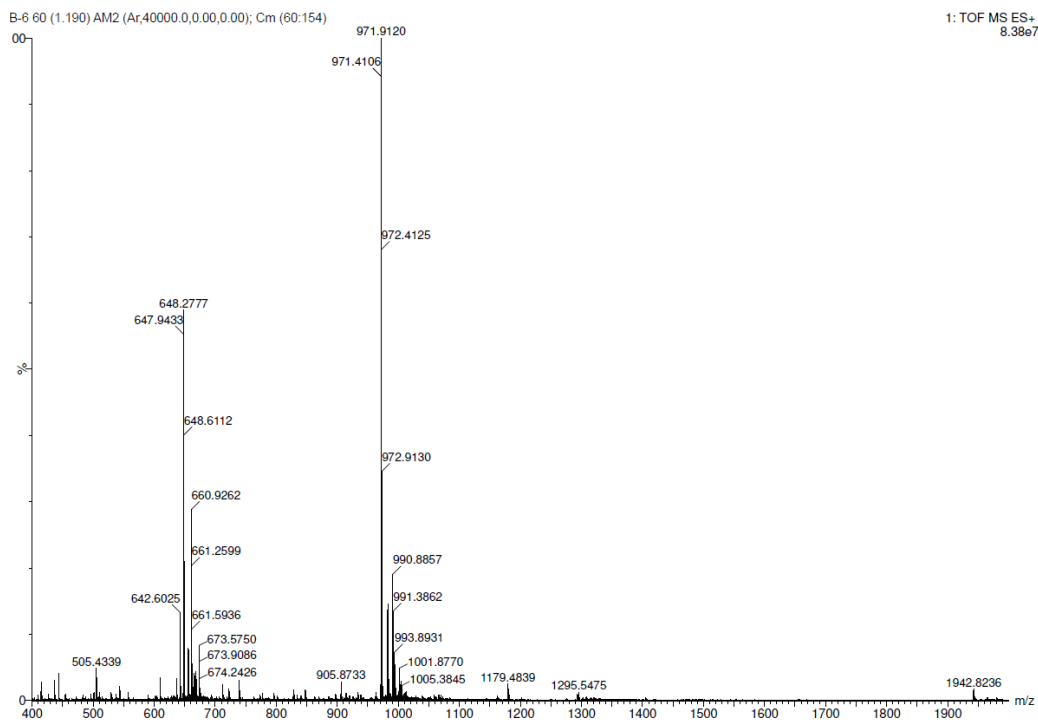

LB-7

HPLC chromatogram

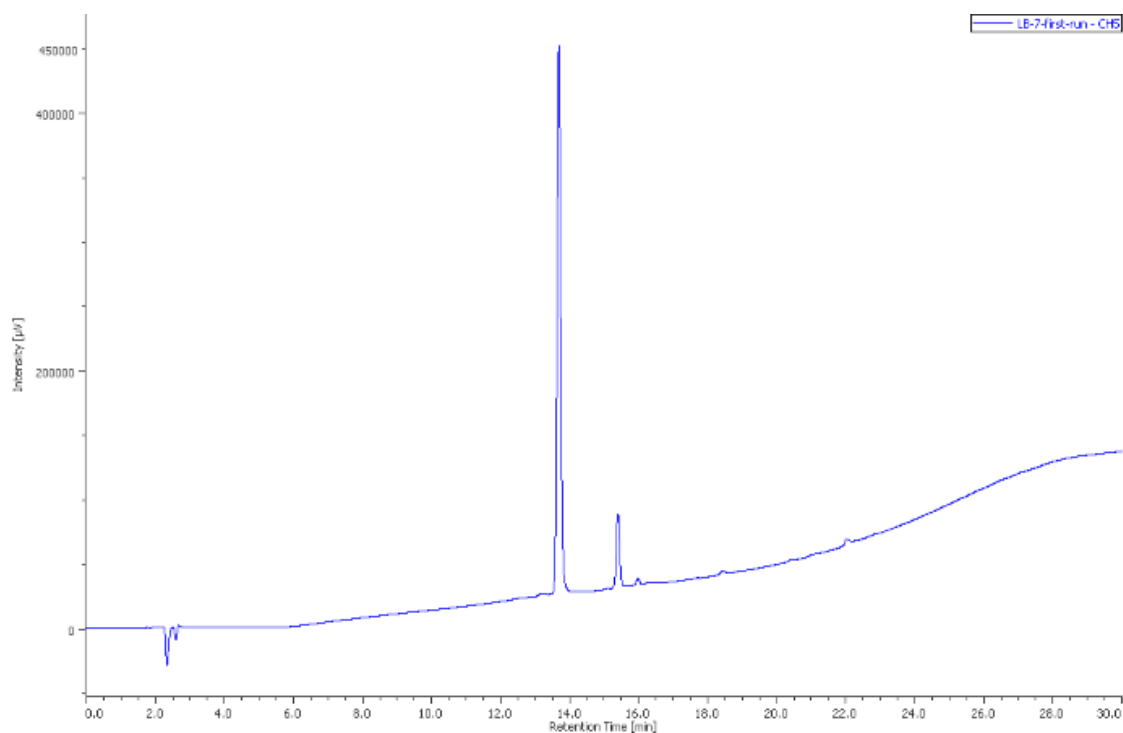

ESI/MS spectrum

#576 AV: 9 IT: 1.889 ST: 0.71 uS: 3 NL: 9.55E4  
F: ITMS + c HESI Full ms [110.00-2000.00]

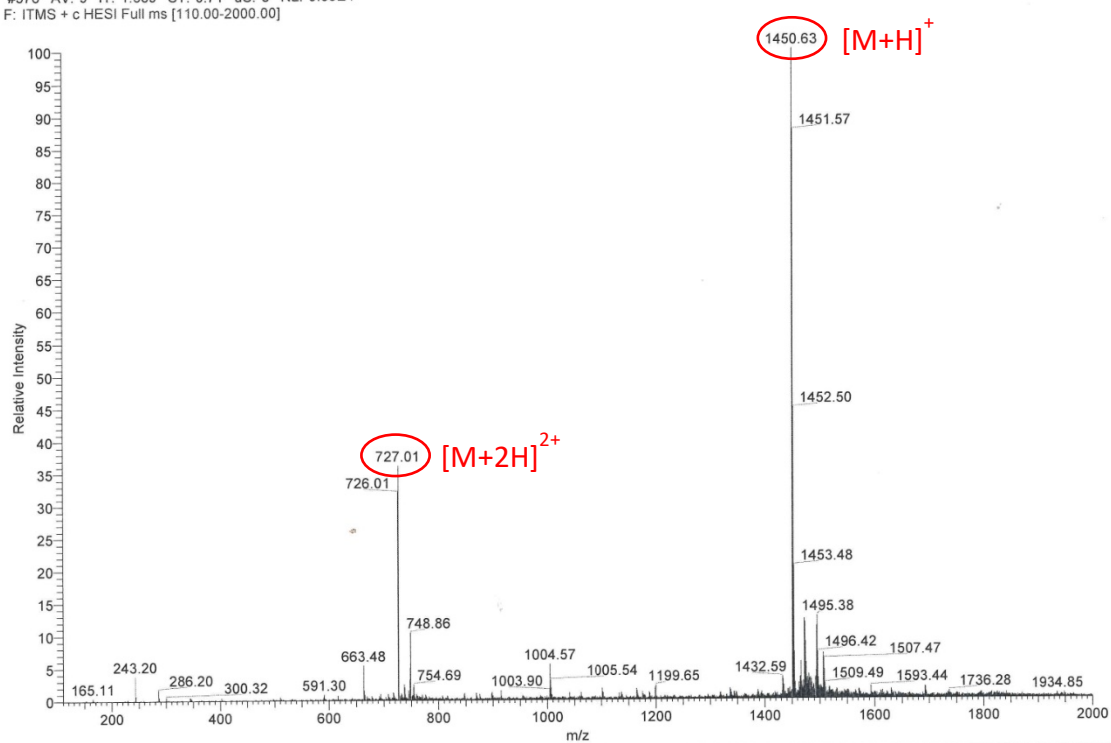

Figure S4: RP-HPLC chromatograms, GC-MS and ESI spectra of purified  $GAC_{182-192}$ , LB5, LB6 and LB7. HRMS of LB6.
